# Supplementary material
Source: PubMed Central journal article supplement (PMC4213607)
Supplement: rspb20140784supp1.pdf [file rspb20140784supp1.pdf]

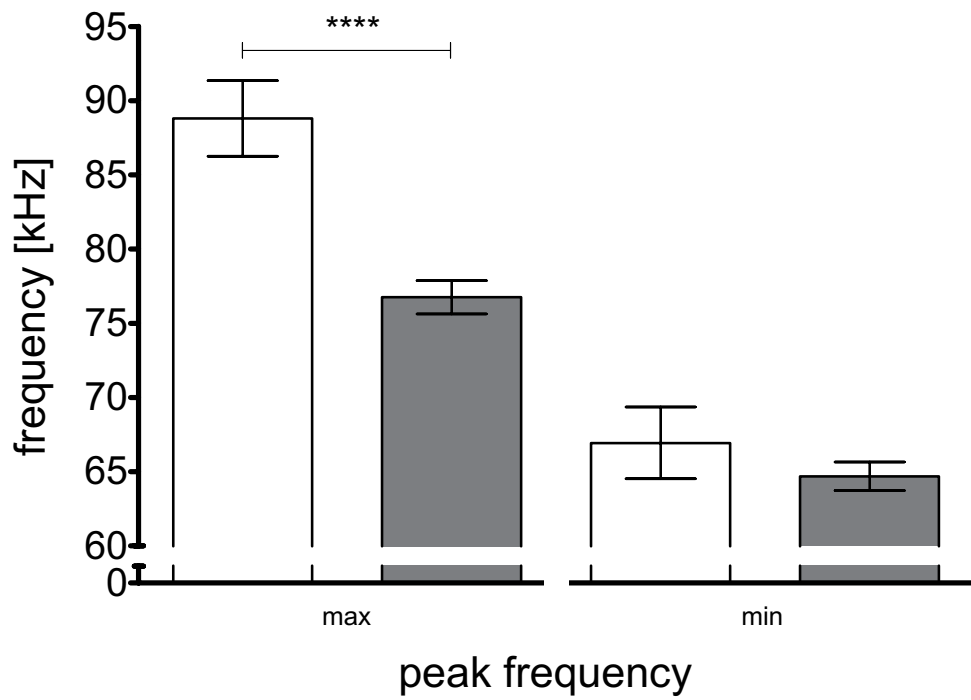

Supplementary figure 2. The bar graph shows maximal (maxentire) and minimal (minentire) peak frequencies of USV (“pup isolation calls”) three days after birth in WT ( $N=7$  animals; white bars) and *Period1*-deficient (*Per1*<sup>-/-</sup>;  $N=12$  animals; grey bars) mice. Mean maximal peak frequency was lower in *Per1*<sup>-/-</sup> compared to WT mice. Genotype comparison was done by t-test (\*\*\*\* =  $P \leq 0.0001$ ). All values are given as mean  $\pm$  SEM.
