# Supplementary material
Source: PubMed Central journal article supplement (PMC4213607)
Supplement: rspb20140784supp2.pdf [file rspb20140784supp2.pdf]

Table 3 – Pup isolation calls

| Pup (isolation calls)          |                  |                   |                |                 |                   |                    |                |                 |                      |                      |                       |
|--------------------------------|------------------|-------------------|----------------|-----------------|-------------------|--------------------|----------------|-----------------|----------------------|----------------------|-----------------------|
| mean                           | peak freq(start) | peak ampli(start) | peak freq(end) | peak ampli(end) | peak freq(centre) | peak ampli(centre) | peak freq(max) | peak ampli(max) | peak freq(minentire) | peak freq(maxentire) | peak ampli(maxentire) |
| WT 001                         | 74770            | -35,30            | 71569          | -34,32          | 77559             | -16,63             | 79941          | -11,32          | 65136                | 85162                | -11,32                |
| WT 002                         | 65596            | -30,22            | 65637          | -28,50          | 72100             | -9,76              | 73761          | -7,35           | 56490                | 80562                | -7,35                 |
| WT 003                         | 77427            | -36,00            | 79074          | -33,16          | 80488             | -18,71             | 84275          | -12,64          | 69547                | 90639                | -12,64                |
| WT 004                         | 75861            | -40,34            | 73709          | -39,68          | 75762             | -25,13             | 78786          | -17,32          | 64262                | 86132                | -17,32                |
| WT 005                         | 78070            | -37,48            | 75274          | -34,34          | 79021             | -21,01             | 82740          | -14,36          | 67054                | 90062                | -14,36                |
| WT 006                         | 88946            | -34,58            | 86063          | -30,06          | 91348             | -17,64             | 92812          | -12,25          | 77843                | 102049               | -12,25                |
| WT 007                         | 75574            | -32,86            | 73322          | -31,67          | 82247             | -14,13             | 83513          | -10,27          | 68241                | 87086                | -10,27                |
| Mean:                          | 76606            | -35,25            | 74950          | -33,11          | 79789             | -17,57             | 82261          | -12,22          | 66939                | 88812                | -12,22                |
| SD:                            | 6847             | 3,24              | 6363           | 3,62            | 6070              | 4,90               | 5872           | 3,14            | 6416                 | 6729                 | 3,14                  |
| T-Test                         |                  |                   |                |                 |                   |                    |                |                 |                      |                      |                       |
| Per1-/- 001                    | 76332            | -43,72            | 73059          | -39,89          | 74926             | -9,18              | 76050          | -5,32           | 68187                | 80756                | -5,32                 |
| Per1-/- 002                    | 80228            | -41,30            | 78363          | -41,18          | 78679             | -8,94              | 79492          | -5,10           | 72660                | 85170                | -5,10                 |
| Per1-/- 003                    | 67956            | -36,86            | 65064          | -31,77          | 68195             | -10,29             | 67969          | -7,46           | 61004                | 72297                | -7,46                 |
| Per1-/- 004                    | 66695            | -34,75            | 66511          | -41,21          | 66895             | -20,75             | 65774          | -13,30          | 61695                | 71989                | -13,30                |
| Per1-/- 005                    | 74062            | -39,69            | 70218          | -41,80          | 72312             | -15,21             | 72971          | -9,75           | 64866                | 80571                | -9,75                 |
| Per1-/- 006                    | 72536            | -35,79            | 71629          | -44,19          | 71364             | -21,06             | 72432          | -12,73          | 66389                | 78904                | -12,73                |
| Per1-/- 007                    | 70369            | -42,69            | 67743          | -39,84          | 68474             | -14,36             | 69056          | -7,37           | 62801                | 76153                | -7,37                 |
| Per1-/- 008                    | 73583            | -41,45            | 68740          | -40,10          | 70675             | -9,58              | 71753          | -6,58           | 66005                | 75705                | -6,58                 |
| Per1-/- 009                    | 71985            | -39,13            | 65550          | -37,05          | 69263             | -14,53             | 70183          | -8,88           | 61677                | 75795                | -8,88                 |
| Per1-/- 010                    | 71217            | -41,00            | 65892          | -35,68          | 69933             | -9,55              | 70032          | -6,04           | 62492                | 75634                | -6,04                 |
| Per1-/- 011                    | 72571            | -40,38            | 67164          | -42,89          | 68350             | -21,10             | 69329          | -14,81          | 65214                | 74064                | -14,81                |
| Per1-/- 012                    | 71816            | -37,89            | 65693          | -35,00          | 70549             | -12,25             | 71349          | -7,42           | 63245                | 74046                | -7,42                 |
| Mean:                          | 72446            | -39,55            | 68802          | -39,22          | 70801             | -13,90             | 71449          | -8,73           | 64686                | 76757                | -8,73                 |
| SD:                            | 3558             | 2,77              | 3946           | 3,63            | 3280              | 4,79               | 3530           | 3,26            | 3341                 | 3894                 | 3,26                  |
| T-Test:<br>(WT versus Per1-/-) | n.s.             | p ≤ 0.01          | p ≤ 0.02       | p ≤ 0.01        | p ≤ 0.01          | n.s.               | p ≤ 0.0001     | p ≤ 0.05        | n.s.                 | p ≤ 0.0001           | p ≤ 0.05              |

Table legend

Tables 1 to 3 show data from the automated analysis provided by AviSoft SASLabPro for USV parameters (start-, peak-, end- frequency, start-, peak-, end-amplitude, etc.). A mean value was calculated for each parameter of each individual mouse (Table 1 and 2 C3H-1-6; *Per1*-KO-01-16; Table 3 WT1-7; *Per1*<sup>-/-</sup>01-12). These mean values were then tested for Gaussian distribution (normality) with the Kolmogorov-Smirnov test with Lilliefors-modification. If the normality-test was passed we compared the genotypes by Student`s t-test, if not by an appropriate non-parametric test, e.g. Mann-Whitney U-test. All p-values are “given per comparison”.
